# Supplementary material
Source: MDPI journal article supplement (https://www.mdpi.com/1999-4907/9/9/524)
Supplement: s1 [file s1]

## Supplementary material

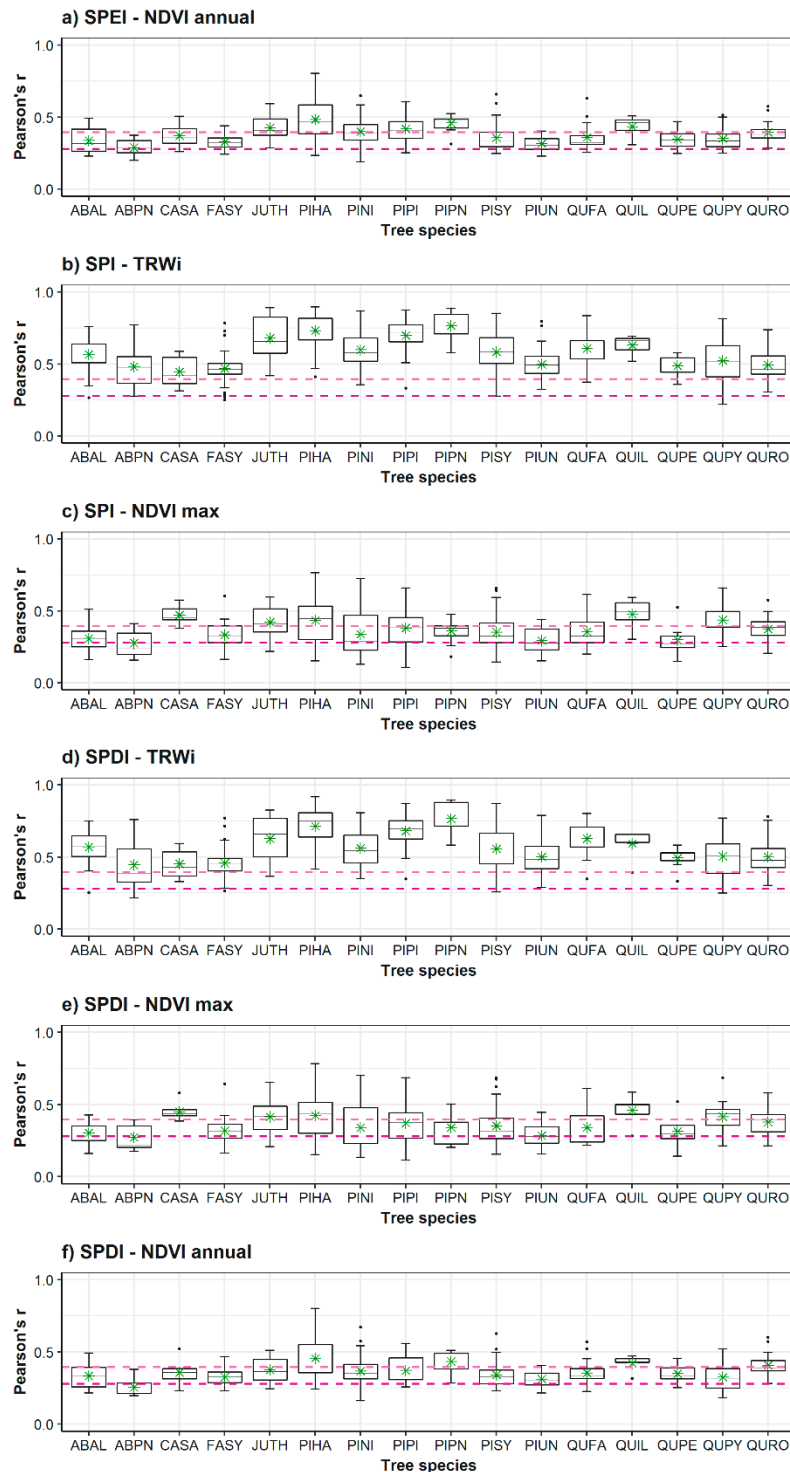

**Figure S1.** Box plots showing the maximum Pearson correlation coefficients computed between NDVI annual (a,f), ring-width indices (TRWi (b,d), and NDVImax (c,e) and the multi-scalar drought indices (SPEI, SPI and SPDI). The solid black line corresponds to the median, green asterisks mark the mean and dashed lines show the significance level at  $p < 0.05$  (light pink) and  $p < 0.01$  (dark pink). Species' codes correspond to those listed in Table 1.

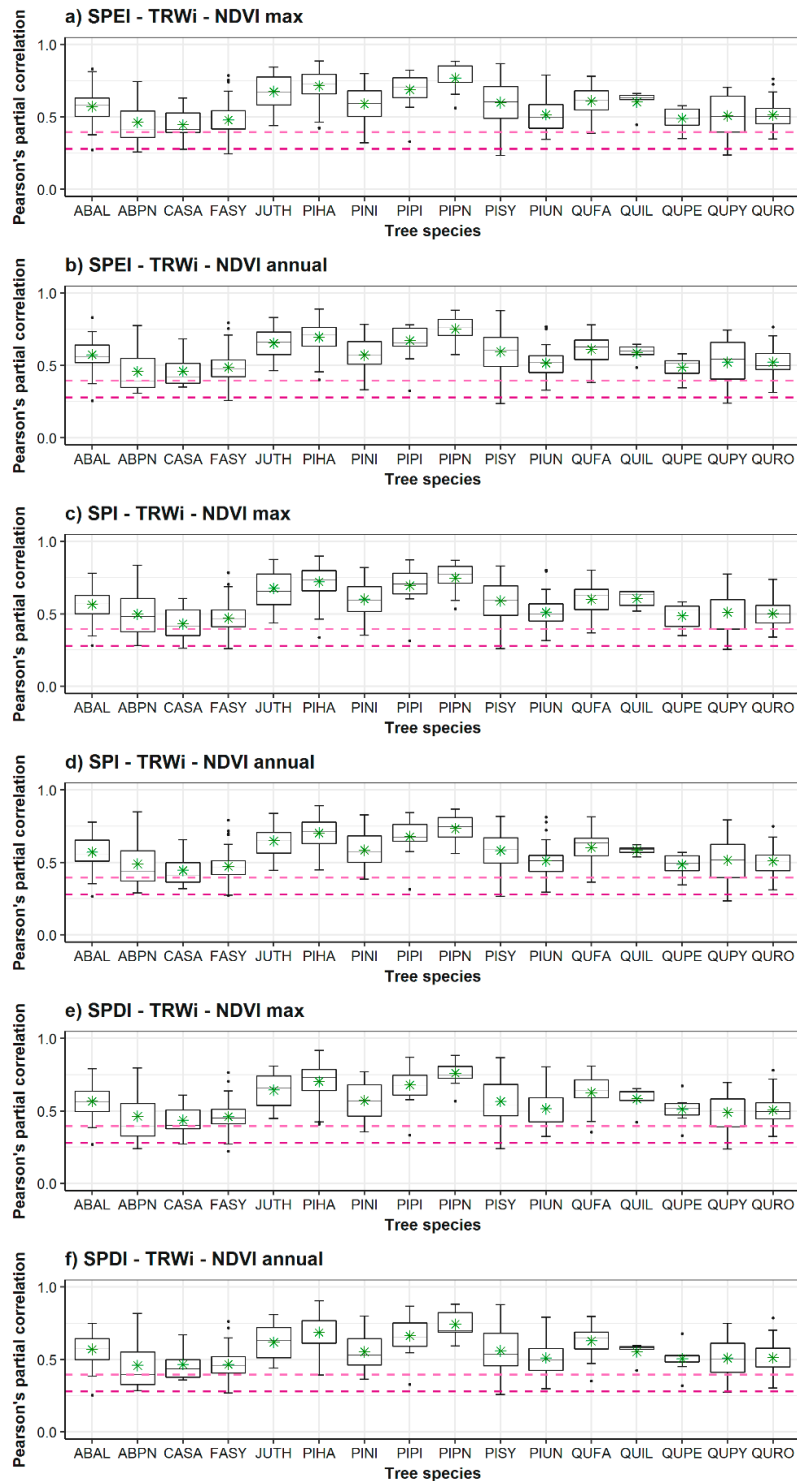

**Figure S2.** Box plots showing the maximum partial Pearson Correlation Coefficients found between TRWi (**b,d**), NDVI max (**c,e**), NDVI annual (**a,f**) and the multi-scalar drought indices. The solid black line corresponds to the median, green asterisks mark the mean and dashed lines show the significance level at  $p < 0.05$  (light pink) and  $p < 0.01$  (dark pink). Species' codes correspond to those listed in Table 1.

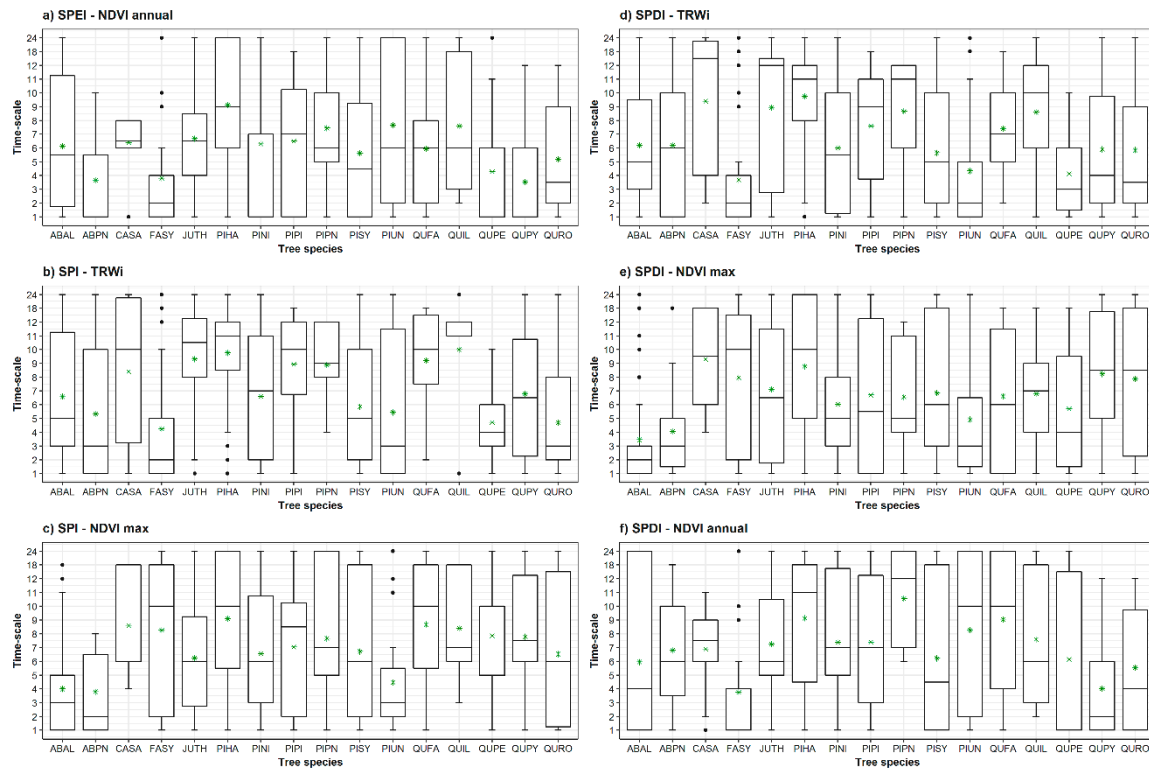

**Figure S3.** Box plots showing the most correlated time-scale found for TRWi (**b,d**), NDVI max (**c,e**), NDVI annual (**a,f**) and the multi-scalar drought indices. The solid black line corresponds to the median, while green asterisks mark the mean. Species' codes correspond to those listed in Table 1.

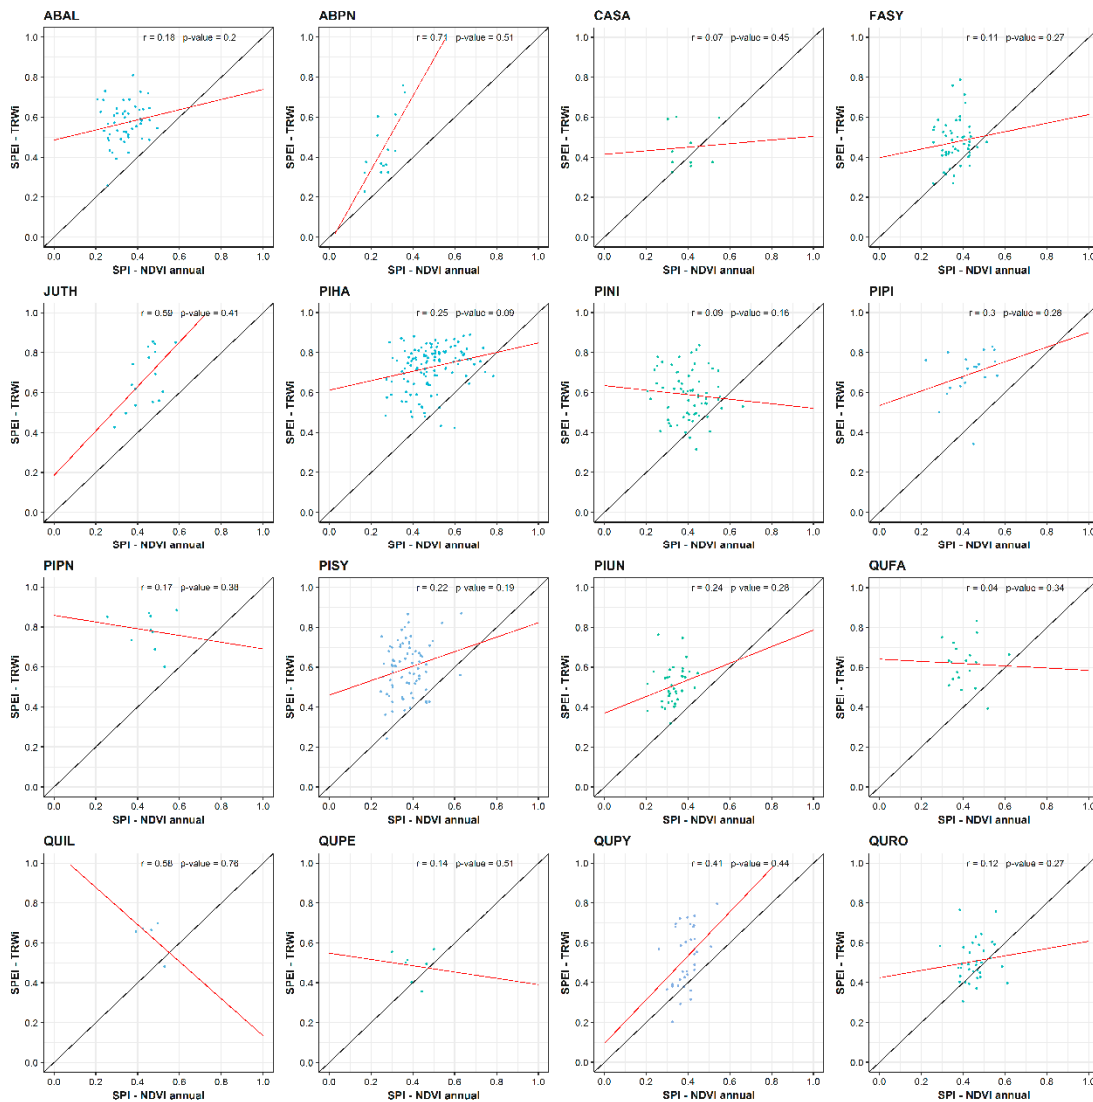

**Figure S4.** Scatterplots showing the maximum Pearson correlation coefficients found for SPEI-TRWi and SPI-NDVI annual by specie. Dashed red line corresponds to the fitted line of regression model and black line 1:1. Species' codes correspond to those listed in Table 1.

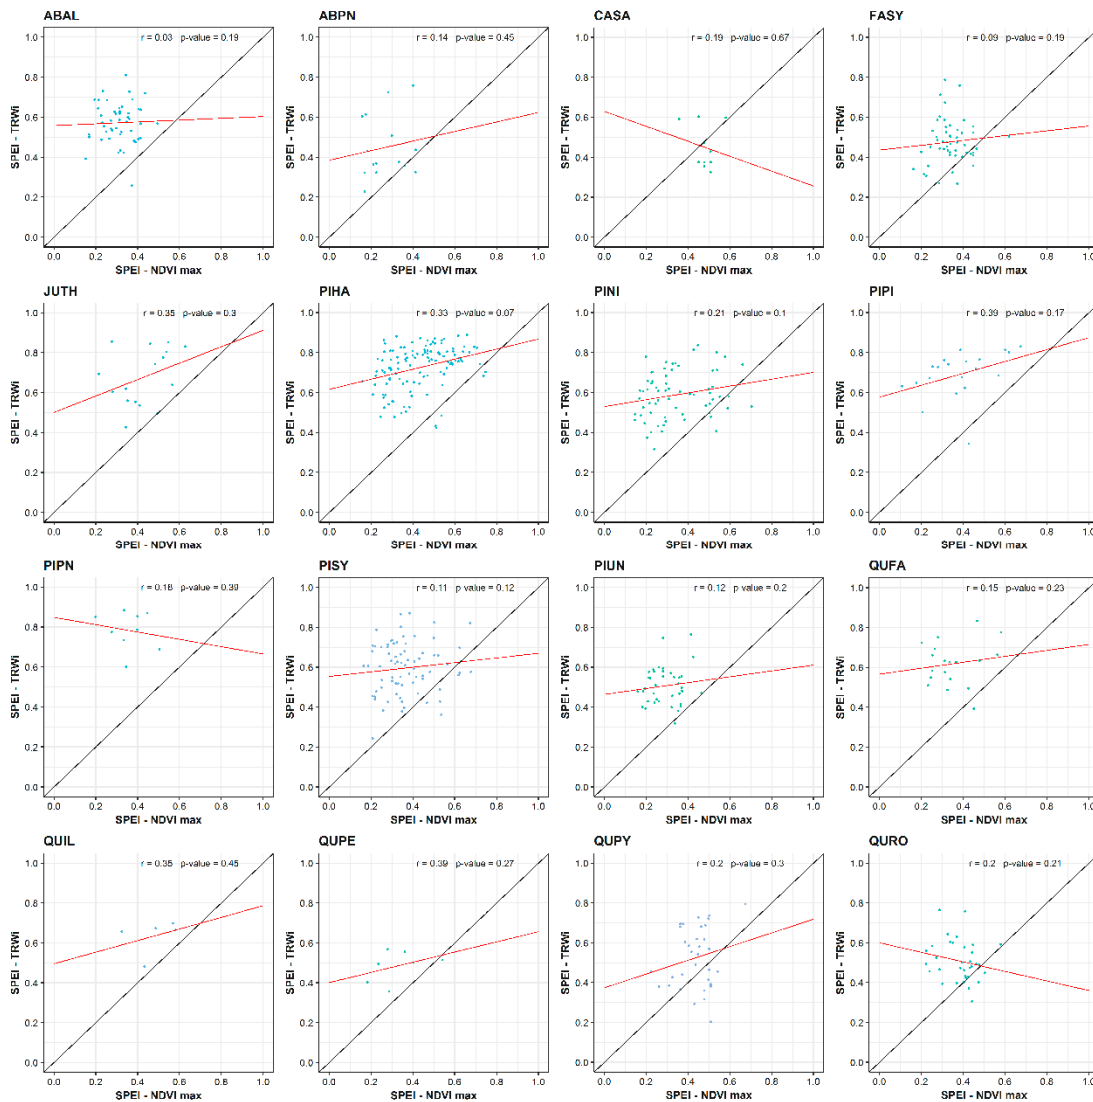

**Figure S5.** Scatterplots showing the maximum Pearson correlation coefficients found for SPEI-TRWi and SPEI-NDVI max by species. Dashed red line corresponds to the fitted line of regression model and black line 1:1. Species' codes correspond to those listed in Table 1.

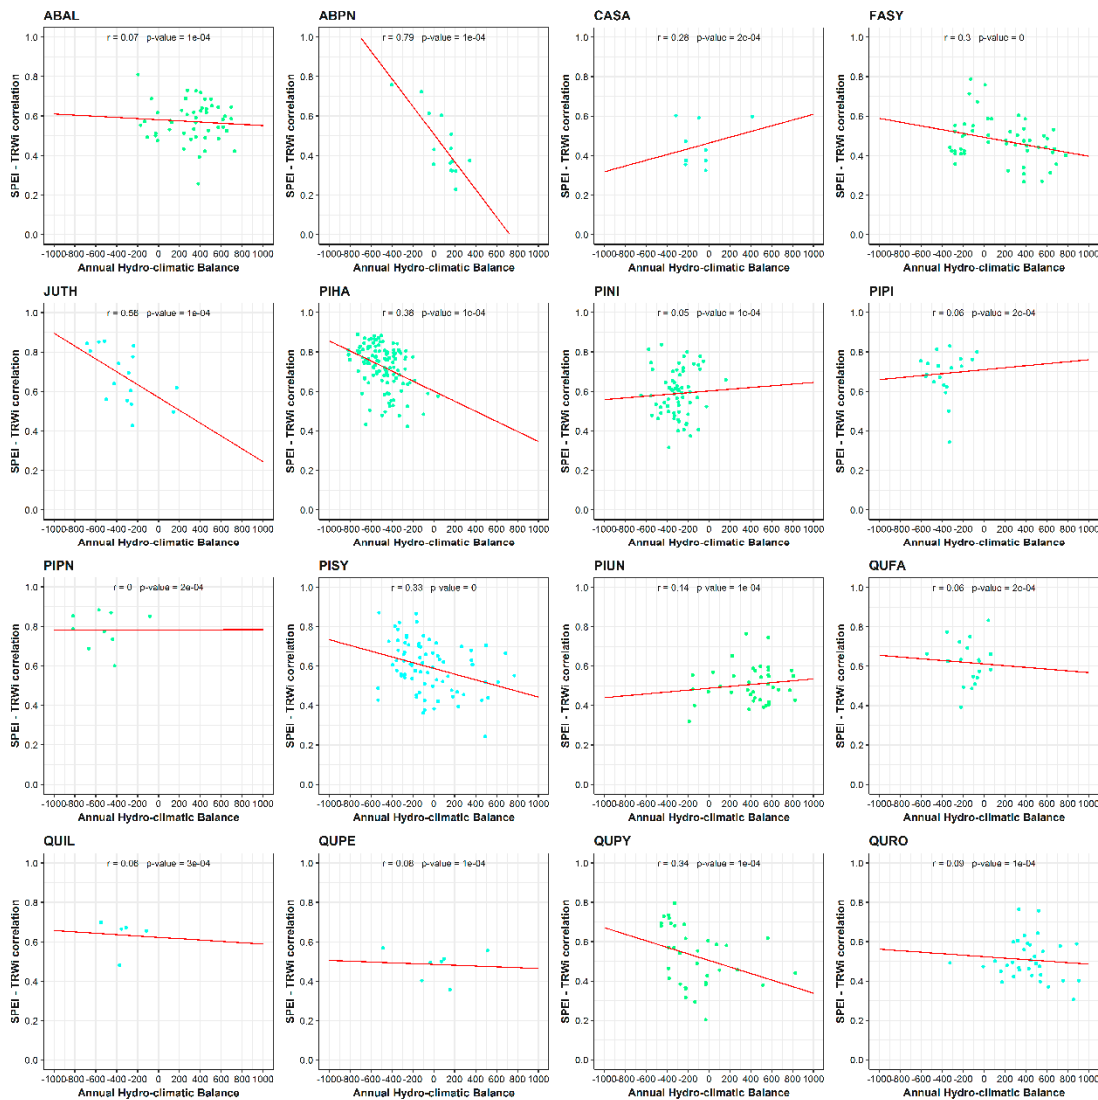

**Figure S6.** Scatterplots showing the maximum Pearson correlation coefficients found for SPEI-TRWi and the average annual hydro-climatic balance by species. Dashed red line corresponds to the fitted lines of regression models. Species' codes correspond to those listed in Table 1.

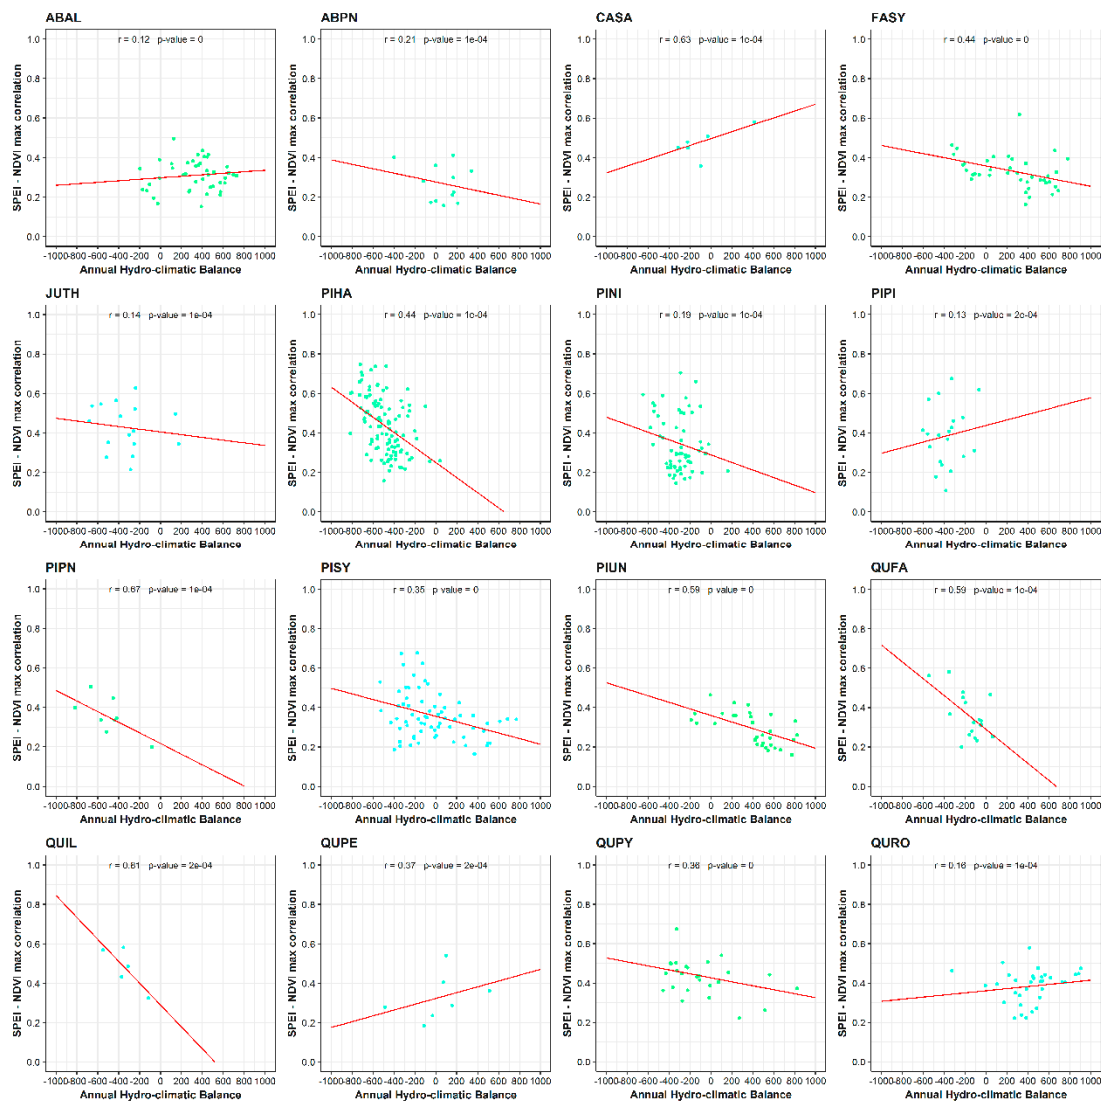

**Figure S7.** Same as Figure S6, but for SPEI-NDVI max. Species' codes correspond to those listed in Table 1.

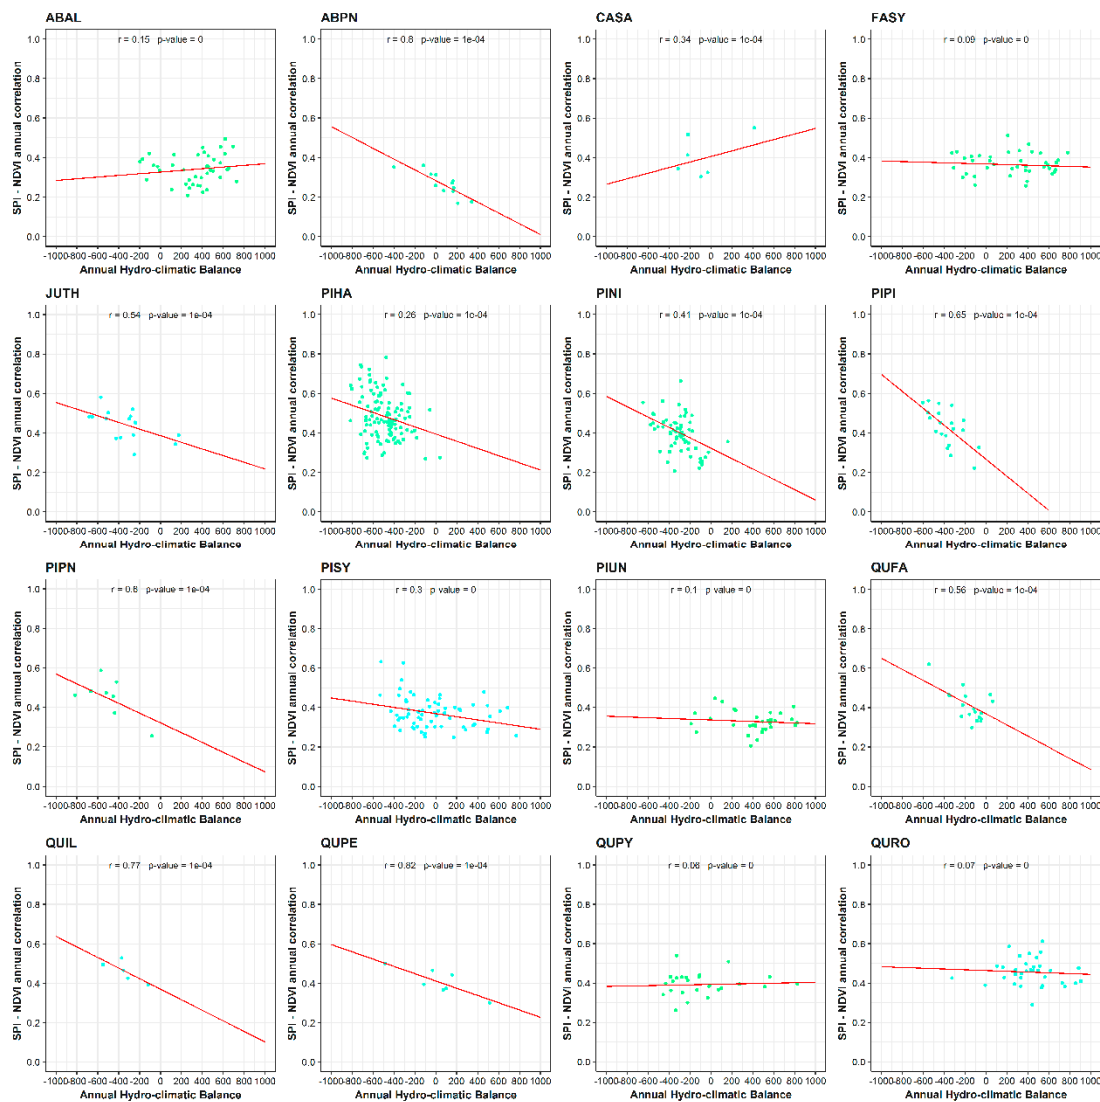

**Figure S8.** Same as Figure S6, but for SPEI-NDVI annual. Species' codes correspond to those listed in Table 1.



**Table S1.** Percentage of sampled forests per drought index and time-scale (number of months) in which the maximum correlation value was found with ring-width indices (TRWi, a), NDVI max (b) and NDVI annual (c). Bold values indicate the maximum percentage for each drought index.

|                    |              | January | February | March | April | May   | June  | July  | August | September | October | November | December |
|--------------------|--------------|---------|----------|-------|-------|-------|-------|-------|--------|-----------|---------|----------|----------|
| <b>TRWi</b>        | <b>SPEI</b>  | 6.15    | 3.76     | 4.27  | 8.89  | 7.52  | 11.79 | 17.09 | 12.14  | 9.06      | 9.40    | 5.30     | 4.62     |
|                    | <b>SPI</b>   | 6.50    | 3.93     | 3.93  | 7.52  | 8.38  | 12.31 | 14.02 | 15.90  | 9.91      | 8.38    | 4.27     | 4.96     |
|                    | <b>SPDI</b>  | 6.84    | 4.44     | 5.30  | 6.84  | 7.52  | 9.06  | 11.97 | 12.65  | 10.43     | 12.65   | 5.47     | 6.84     |
|                    | <b>Total</b> | 19.49   | 12.13    | 13.5  | 23.25 | 23.42 | 33.16 | 43.08 | 40.69  | 29.4      | 30.43   | 15.04    | 16.42    |
| <b>NDVI max</b>    | <b>SPEI</b>  | 5.21    | 6.84     | 8.38  | 21.28 | 10.94 | 10.94 | 3.76  | 2.39   | 8.38      | 7.35    | 6.32     | 8.21     |
|                    | <b>SPI</b>   | 4.19    | 10.09    | 8.38  | 21.11 | 10.60 | 8.38  | 3.25  | 3.08   | 9.40      | 6.67    | 6.67     | 8.21     |
|                    | <b>SPDI</b>  | 4.19    | 8.21     | 8.21  | 20.77 | 11.45 | 10.09 | 3.93  | 2.56   | 8.03      | 8.03    | 7.01     | 7.52     |
|                    | <b>Total</b> | 13.59   | 25.14    | 24.97 | 63.16 | 32.99 | 29.41 | 10.94 | 8.03   | 25.81     | 22.05   | 20       | 23.94    |
| <b>NDVI annual</b> | <b>SPEI</b>  | 3.42    | 12.48    | 5.30  | 3.25  | 37.61 | 2.22  | 7.18  | 3.59   | 2.56      | 3.76    | 12.65    | 5.98     |
|                    | <b>SPI</b>   | 2.91    | 11.45    | 3.42  | 2.74  | 32.48 | 1.03  | 3.08  | 3.93   | 3.59      | 4.27    | 25.13    | 5.98     |
|                    | <b>SPDI</b>  | 5.98    | 15.21    | 5.30  | 3.42  | 20.85 | 1.20  | 5.81  | 7.69   | 3.08      | 5.81    | 17.26    | 8.38     |
|                    | <b>Total</b> | 12.31   | 39.14    | 14.02 | 9.41  | 90.94 | 4.45  | 16.07 | 15.21  | 9.23      | 13.84   | 55.04    | 20.34    |
